# Supplementary material for: Gene editing of the multi-copy H2A.B gene and its importance for fertility
Source: PubMed Central journal article supplement (PMC6357441; doi:10.1186/s13059-019-1633-3), 2019-01-31
Supplement: 13059_2019_1633_MOESM1_ESM.pdf [file 13059_2019_1633_MOESM1_ESM.pdf]

| <b>Gene names/length</b>                        | <b>Strand</b> | <b>Chromosome</b> | <b>Start</b> | <b>End</b> | <b>% Identity</b> |
|-------------------------------------------------|---------------|-------------------|--------------|------------|-------------------|
| H2afb3, 348bp<br>ENSMUSG00000083616             | -             | X                 | 117426357    | 117426704  | 100               |
| Gm14920, 348bp<br>ENSMUSG00000067441            | +             | X                 | 114128366    | 114128713  | 98.28             |
| H2afb2, 349bp<br>EG624153                       | +             | X                 | 113794787    | 113795134  | 92.55             |
| Gm14904(Pseudo),<br>345bp<br>ENSMUSG00000084053 | +             | X                 | 113311798    | 113312139  | 87.83             |

**Table S1.**
