# Supplementary material for: Gene editing of the multi-copy H2A.B gene and its importance for fertility
Source: PubMed Central journal article supplement (PMC6357441; doi:10.1186/s13059-019-1633-3), 2019-01-31
Supplement: 13059_2019_1633_MOESM3_ESM.pdf [file 13059_2019_1633_MOESM3_ESM.pdf]

| Target genes                               | Design # | Targeted sequence     |
|--------------------------------------------|----------|-----------------------|
| H2Afb3<br>(Group 1)                        | 101406   | ttCAGGTCGCCGCCACCGTcg |
|                                            | 101407   | gtCGCCGCCACCGTCGCTcc  |
|                                            | 101408   | gtCGCCGCCACCGTCGCTCcc |
|                                            | 101409   | ctCACAGCAAAGATTAGCTca |
|                                            | 101410   | ctCACAGCAAAGATTAGCtc  |
|                                            | 101412   | ctCACAGCAAAGATTtag    |
|                                            | 101413   | ctGAGCTAATCTTTGCTgt   |
|                                            | 101415   | ctAATCTTTGCTGTga      |
|                                            | 101416   | ctAATCTTTGCTGTGAgc    |
|                                            | 101417   | ctAACCTCCCTCAGATGCTgt |
|                                            | 101418   | ctAACCTCCCTCAGATgc    |
|                                            | 101419   | ctCCGGGCACGGCTAACCTcc |
| H2Afb3,<br>Gm14920,<br>H2afb2<br>(Group 2) | 101421   | ctCCCGCACCTCCAGAGct   |
|                                            | 101422   | ctGTTCCACCAGGCTCACag  |
|                                            | 101423   | ctGCTGTTCCACCAGGCTca  |
|                                            | 101424   | ctGGTGGAACAGCATCTga   |
|                                            | 101426   | gtATCACTGAGCCTCCgg    |
|                                            | 101427   | gtTGCTGGAGCTTgc       |
|                                            | 101429   | gtACCTCTGCGTTcc       |

**Table S2.**
