# Supplementary material for: Gene editing of the multi-copy H2A.B gene and its importance for fertility
Source: PubMed Central journal article supplement (PMC6357441; doi:10.1186/s13059-019-1633-3), 2019-01-31

Figure S3

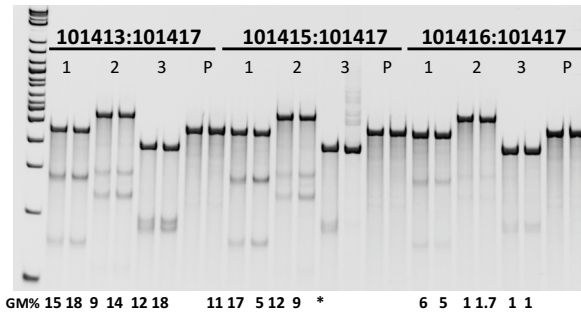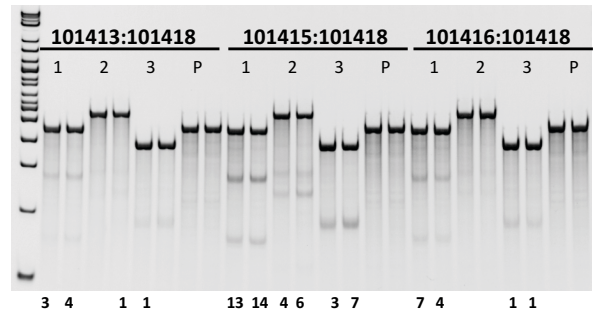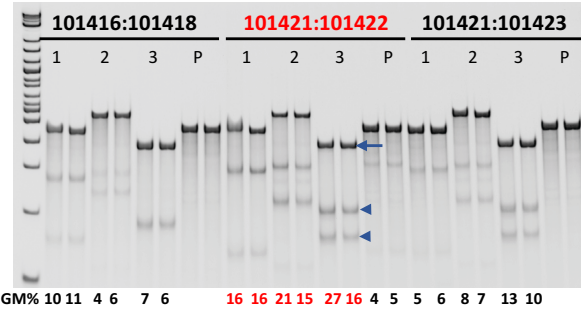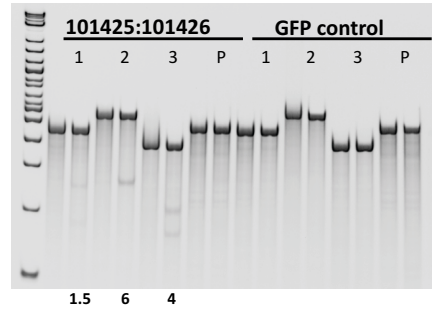

Supplement: 13059_2019_1633_MOESM5_ESM.pdf [file 13059_2019_1633_MOESM5_ESM.pdf]
