# Supplementary material for: Gene editing of the multi-copy H2A.B gene and its importance for fertility
Source: PubMed Central journal article supplement (PMC6357441; doi:10.1186/s13059-019-1633-3), 2019-01-31
Supplement: 13059_2019_1633_MOESM6_ESM.pdf [file 13059_2019_1633_MOESM6_ESM.pdf]

Figure S4

101408 CGCCGCCACCGTCGCT

101407 CGCCGCCACCGTCG

101421 CCCGCACCTCCAGAG

H2Afb3 **ATGCCAAGGAACAGGGAAAACTGTCTTCGAGAGTCTTCAGGTCGCCGCCACCGTCGCTCCCCGCACCTCCAGAGCT**  
 gm14920 -----  
 H2Afb2 -----C-----A-AG-----A-----A-A-A-----G-  
 Pseudo -----G-CA-----A-----T-G-G-----T-A-----T-T-----:-----C

CGATTAGAAAACGACAC 101410

TTAGAAAACGACAC 101412

H2Afb3 **GAGCTAATCTTTGCTGTGAGCCTGGTGGAAACAGCATCTGAGGGAGGTTAGCCGTGCCCGGAGGCTCAGTGATACG**  
 gm14920 -----G-----A-----A-----T-----T-----  
 H2Afb2 -----G-----A-----T-----  
 Pseudo -----G-----A-A-----AG-----CC-----A-----T-----T-----

**CACTCGGACCACCTTG 101422**

H2Afb3 **GTGCCCATCTTCTGGCAGCCATCCTGGAGTCCCTCACCCGCAGGTTGCTGGAGCTTGCCGGCAATGAGGCCCAA**  
 gm14920 -----G-----  
 H2Afb2 -----G-C-----T-----T-----A-----G-----  
 Pseudo -----A-T-----T-----TA-----C-----G-----A-----G

H2Afb3 **CGCAGAGGTACCGAGAGGCGCATCAACTCCTGAACTGCTGGACTTGGCTGTCTACAGCAATATGGAGCTAAGTGA**  
 gm14920 -----  
 H2Afb2 -----C-----T-----C-C-----AG-----G-----  
 Pseudo -----AG-----C-T-A-----AG-----T-----C-----
