# Supplementary material for: Gene editing of the multi-copy H2A.B gene and its importance for fertility
Source: PubMed Central journal article supplement (PMC6357441; doi:10.1186/s13059-019-1633-3), 2019-01-31
Supplement: 13059_2019_1633_MOESM8_ESM.pdf [file 13059_2019_1633_MOESM8_ESM.pdf]

| Sample ID | Total reads | Read length (bp) | Approximate coverage (x) |
|-----------|-------------|------------------|--------------------------|
| NM4-G1-28 | 226,900,000 | 100              | 613                      |
| NM4-G2-18 | 228,900,000 | 100              | 619                      |
| NM4-G3-32 | 129,800,000 | 100              | 351                      |

**Table S3.** The exome sequencing coverage. 3 consecutive generations of mice from the NM4 H2A.B.3 KO colony were sequenced using paired-end sequencing with a 100bp read length.
