# Supplementary material for: Gene editing of the multi-copy H2A.B gene and its importance for fertility
Source: PubMed Central journal article supplement (PMC6357441; doi:10.1186/s13059-019-1633-3), 2019-01-31
Supplement: 13059_2019_1633_MOESM9_ESM.pdf [file 13059_2019_1633_MOESM9_ESM.pdf]

Figure S6

TALEN-induced deletions of the three H2A.B.3 genes.

H2Afb3

**WT FVB/NJArc** CGCACCTCCAGAGCTGAGCTAATCTTTGCTGTGAGCCTGGTGGAACAGCATCTGAGGGAG  
**NM4** CGCACCTCCAGAGCTGAG ----- CTTTGTGTGAGCCTGGTGGAACAGCATCTGAGGGAG  $\Delta$  5

Gm14920

**WT FVB/NJArc** CAGGTCGCCGCCACCGTCGCTCCCGCACCTCCAGAGCTGAGCTGATCTTTGCAGTGAGCC  
**NM4** CAGGTCGCCGCCACCGTCGCTCCCGCACCTCCAGAGCTGAG ----- CAGTGAGCC  $\Delta$  10

H2Afb2

**WT FVB/NJArc** CAGGTCACCGCCAACATCACTCCCGCACCTCCAGAGGTGAGCTGATCTTTGCAGTGAGCC  
**NM4** CAGGTCACCGCCAACATCACTCCCGCACCTCCAGA- - - - -

**WT FVB/NJArc** TGGTGGAACAGCATCTGAGGGAGTTAGCCGTGCCCGGAGGCTCAGTGATATGGTGCCCGT  
**NM4** - - - - - GGCTCAGTGATATGGTGCCCGT  $\Delta$  64
