# Supplementary material for: Gene editing of the multi-copy H2A.B gene and its importance for fertility
Source: PubMed Central journal article supplement (PMC6357441; doi:10.1186/s13059-019-1633-3), 2019-01-31
Supplement: 13059_2019_1633_MOESM10_ESM.pdf [file 13059_2019_1633_MOESM10_ESM.pdf]

| Sample ID | SNVs      | Small deletions | Small insertions |
|-----------|-----------|-----------------|------------------|
| NM4-G1-28 | 1,745,670 | 82,379          | 90,762           |
| NM4-G2-18 | 1,768,957 | 81,956          | 90,005           |
| NM4-G3-32 | 693,686   | 33,823          | 38,321           |

**Table S4.**
