# Supplementary material for: Gene editing of the multi-copy H2A.B gene and its importance for fertility
Source: PubMed Central journal article supplement (PMC6357441; doi:10.1186/s13059-019-1633-3), 2019-01-31
Supplement: 13059_2019_1633_MOESM11_ESM.pdf [file 13059_2019_1633_MOESM11_ESM.pdf]

| Sample ID | SNVs   | Small deletions | Small insertions |
|-----------|--------|-----------------|------------------|
| NM4-G1-28 | 21,256 | 3,889           | 4,378            |
| NM4-G2-18 | 26,646 | 4,064           | 4,445            |
| NM4-G3-32 | 13,417 | 1,589           | 2,032            |

**Table S5.**
