# Supplementary material for: Gene editing of the multi-copy H2A.B gene and its importance for fertility
Source: PubMed Central journal article supplement (PMC6357441; doi:10.1186/s13059-019-1633-3), 2019-01-31
Supplement: 13059_2019_1633_MOESM12_ESM.pdf [file 13059_2019_1633_MOESM12_ESM.pdf]

| Sample ID | Genotype   |     |     |              |     |     | No Call | Total |
|-----------|------------|-----|-----|--------------|-----|-----|---------|-------|
|           | Homozygous |     |     | Heterozygous |     |     |         |       |
|           | 0/0        | 1/1 | 2/2 | 0/1          | 0/2 | 1/2 |         |       |
| NM4-G1-28 | 131        | 732 | 2   | 388          | 2   | 27  | 111     | 1393  |
| NM4-G2-18 | 127        | 727 | 3   | 392          | 3   | 25  | 116     | 1393  |
| NM4-G3-32 | 219        | 527 | 8   | 306          | 4   | 15  | 314     | 1393  |

**Table S6.**
