# Supplementary material for: Gene editing of the multi-copy H2A.B gene and its importance for fertility
Source: PubMed Central journal article supplement (PMC6357441; doi:10.1186/s13059-019-1633-3), 2019-01-31
Supplement: 13059_2019_1633_MOESM14_ESM.pdf [file 13059_2019_1633_MOESM14_ESM.pdf]

| #  | Chromosome | Locus start | Locus end | Deletion size (bp) | Gene ID            |
|----|------------|-------------|-----------|--------------------|--------------------|
| 1  | 1          | 171573961   | 171573965 | 4                  | ENSMUSG00000004709 |
| 2  | 1          | 173270636   | 173270648 | 12                 | ENSMUSG00000049605 |
| 3  | 1          | 173760152   | 173760189 | 38                 | ENSMUSG00000073489 |
| 4  | 12         | 115158545   | 115158549 | 5                  | ENSMUSG00000093894 |
| 5  | 12         | 115335195   | 115335199 | 5                  | ENSMUSG00000095197 |
| 6  | 12         | 115808522   | 115808526 | 21                 | ENSMUSG00000091087 |
| 7  | 12         | 115833994   | 115834007 | 14                 | ENSMUSG00000096020 |
| 8  | 17         | 23882468    | 23882474  | 7                  | ENSMUSG00000096445 |
| 9  | 17         | 35266213    | 35266218  | 6                  | ENSMUSG00000073411 |
| 10 | 17         | 36189406    | 36189415  | 10                 | ENSMUSG00000054128 |
| 11 | 17         | 48145527    | 48145531  | 5                  | ENSMUSG00000073386 |
| 12 | 2          | 119618224   | 119618250 | 27                 | ENSMUSG00000072980 |
| 13 | 3          | 7604075     | 7604079   | 5                  | ENSMUSG00000040329 |
| 14 | 4          | 41195246    | 41195333  | 88                 | ENSMUSG00000028433 |
| 15 | 4          | 42871823    | 42871856  | 34                 | ENSMUSG00000050141 |
| 16 | 5          | 113819659   | 113819689 | 31                 | ENSMUSG00000048163 |
| 17 | 7          | 8245023     | 8245027   | 5                  | ENSMUSG00000053720 |
| 18 | 7          | 47981089    | 47981093  | 5                  | ENSMUSG00000067173 |
| 19 | X          | 95940663    | 95940678  | 16                 | ENSMUSG00000057421 |

**Table S7.**
