# Supplementary material for: Gene editing of the multi-copy H2A.B gene and its importance for fertility
Source: Genome Biol. 2019 Jan 31;20:23. doi: 10.1186/s13059-019-1633-3 (PMC6357441; doi:10.1186/s13059-019-1633-3)
Supplement: Supplementary file 27 — Table S15. Results of the differential splicing analysis showing the number of retained introns comparing wt with H2A.B.3 KO round spermatids. (XLSX 15 kb) [file 13059_2019_1633_MOESM27_ESM.xlsx]

## Sheet: RI_suppa_results
	ensembl_gene_id	Event_id	RI-RI_dPSI	RI-RI_p-val	qval	lfdr	tpm
1	ENSMUSG00000000605	ENSMUSG00000000605;RI:7:7290399:7290585-7291411:7291956:-	NA	1	1	1	1.33086
2	ENSMUSG00000000605	ENSMUSG00000000605;RI:7:7291411:7291726-7291820:7291956:-	-0.141198	0.0564436	1	1	1.33086
3	ENSMUSG00000001249	ENSMUSG00000001249;RI:7:31103154:31103194-31103301:31103423:-	0.310738	0.0959041	1	1	0.0487403
4	ENSMUSG00000002948	ENSMUSG00000002948;RI:8:4245695:4245825-4247657:4247897:+	0.0672639	0.0514486	1	1	2.21491
5	ENSMUSG00000004266	ENSMUSG00000004266;RI:6:124720707:124720908-124721080:124721222:-	0.327068	0.0789211	1	1	0.0164948
6	ENSMUSG00000004455	ENSMUSG00000004455;RI:5:122172732:122172803-122173146:122173280:+	0.25769	0.0779221	1	1	2.75172
7	ENSMUSG00000004455	ENSMUSG00000004455;RI:5:122172732:122172955-122173146:122173280:+	-0.000654587	1	1	1	2.75172
8	ENSMUSG00000004455	ENSMUSG00000004455;RI:5:122174055:122174115-122174980:122175273:+	-0.00505015	1	1	1	2.75172
9	ENSMUSG00000005774	ENSMUSG00000005774;RI:3:94956487:94956606-94956721:94956802:+	NA	1	1	1	0.60459
10	ENSMUSG00000005774	ENSMUSG00000005774;RI:3:94957782:94957885-94958250:94961349:+	0.229992	0.0809191	1	1	0.60459
11	ENSMUSG00000006395	ENSMUSG00000006395;RI:4:118360306:118360337-118360340:118360389:+	-0.654019	0.035964	1	1	-0.604053
12	ENSMUSG00000010086	ENSMUSG00000010086;RI:11:61450828:61450902-61450978:61451034:-	0.113184	0.0894106	1	1	0.206279
13	ENSMUSG00000020399	ENSMUSG00000020399;RI:11:46456256:46456284-46456432:46456594:+	0.333333	0.0874126	1	1	-1.23445
14	ENSMUSG00000020463	ENSMUSG00000020463;RI:11:29218456:29218685-29220544:29220797:+	-0.0705025	0.0554446	1	1	1.16621
15	ENSMUSG00000020701	ENSMUSG00000020701;RI:11:82434243:82434700-82434977:82435179:+	0.333333	0.0874126	1	1	-0.843577
16	ENSMUSG00000021850	ENSMUSG00000021850;RI:14:49245041:49245261-49245358:49245397:-	0.249627	0.0174825	1	1	2.13624
17	ENSMUSG00000022203	ENSMUSG00000022203;RI:14:54920903:54921014-54921101:54921181:-	0.41949	0.0559441	1	1	-0.291684
18	ENSMUSG00000024743	ENSMUSG00000024743;RI:19:10426299:10426463-10426611:10426667:+	-0.649467	0.041958	1	1	-0.127955
19	ENSMUSG00000025409	ENSMUSG00000025409;RI:10:127287396:127287538-127287627:127287690:-	0.0759307	0.0714286	1	1	1.23327
20	ENSMUSG00000026409	ENSMUSG00000026409;RI:1:130697017:130697085-130697906:130698085:-	0.0779998	0.0914086	1	1	1.05939
21	ENSMUSG00000026409	ENSMUSG00000026409;RI:1:130697697:130698085-130698679:130698743:-	0.106976	0.0914086	1	1	1.05939
22	ENSMUSG00000028068	ENSMUSG00000028068;RI:3:88100626:88100716-88101428:88101595:+	-0.24676	0.0744256	1	1	-0.0599868
23	ENSMUSG00000029650	ENSMUSG00000029650;RI:5:147894481:147894596-147894709:147894815:-	0.275946	0.042957	1	1	0.087583
24	ENSMUSG00000030094	ENSMUSG00000030094;RI:6:91496088:91496169-91498030:91498190:-	-0.130662	0.0979021	1	1	0.073305
25	ENSMUSG00000030846	ENSMUSG00000030846;RI:7:128443807:128443946-128444281:128444404:-	NA	1	1	1	1.42685
26	ENSMUSG00000030846	ENSMUSG00000030846;RI:7:128446731:128446798-128447039:128447107:-	0.216955	0.017982	1	1	1.42685
27	ENSMUSG00000031634	ENSMUSG00000031634;RI:8:45980315:45980467-45980573:45980639:+	0.232896	0.0564436	1	1	0.991333
28	ENSMUSG00000031634	ENSMUSG00000031634;RI:8:45980315:45980492-45980573:45980639:+	0.104055	0.0564436	1	1	0.991333
29	ENSMUSG00000031939	ENSMUSG00000031939;RI:9:15306873:15306990-15307728:15307821:+	-0.240408	0.0744256	1	1	1.11643
30	ENSMUSG00000031939	ENSMUSG00000031939;RI:9:15310358:15310409-15311527:15311695:+	NA	1	1	1	1.11643
31	ENSMUSG00000031939	ENSMUSG00000031939;RI:9:15313990:15314032-15314231:15314264:+	NA	1	1	1	1.11643
32	ENSMUSG00000031939	ENSMUSG00000031939;RI:9:15313990:15314264-15315102:15315131:+	NA	1	1	1	1.11643
33	ENSMUSG00000031939	ENSMUSG00000031939;RI:9:15315102:15315131-15315383:15315440:+	NA	1	1	1	1.11643
34	ENSMUSG00000031939	ENSMUSG00000031939;RI:9:15315383:15315440-15316889:15316978:+	NA	1	1	1	1.11643
35	ENSMUSG00000032125	ENSMUSG00000032125;RI:9:37404074:37404201-37404293:37404521:+	0.00671481	1	1	1	-0.57259
36	ENSMUSG00000032125	ENSMUSG00000032125;RI:9:37405573:37405741-37405898:37406083:+	-0.59779	0.0819181	1	1	-0.57259
37	ENSMUSG00000032127	ENSMUSG00000032127;RI:9:44353837:44353998-44354103:44354291:-	NA	1	1	1	0.707057
38	ENSMUSG00000032127	ENSMUSG00000032127;RI:9:44355699:44355850-44356228:44356429:-	NA	1	1	1	0.707057
39	ENSMUSG00000032127	ENSMUSG00000032127;RI:9:44355699:44355850-44356295:44356429:-	0.580135	0.048951	1	1	0.707057
40	ENSMUSG00000032198	ENSMUSG00000032198;RI:9:21800180:21800399-21801171:21801332:-	0.387235	0.0819181	1	1	0.147387
41	ENSMUSG00000032878	ENSMUSG00000032878;RI:11:28576391:28576989-28577074:28577345:-	-0.401338	0.0804196	1	1	-0.376585
42	ENSMUSG00000035242	ENSMUSG00000035242;RI:10:80828237:80828291-80828296:80828382:+	-0.128232	0.020979	1	1	1.82189
43	ENSMUSG00000035242	ENSMUSG00000035242;RI:10:80828237:80828294-80828296:80828382:+	0.0810691	0.026973	1	1	1.82189
44	ENSMUSG00000035245	ENSMUSG00000035245;RI:6:97147877:97148008-97148191:97148258:-	0.292337	0.0174825	1	1	0.296186
45	ENSMUSG00000036062	ENSMUSG00000036062;RI:4:42933616:42933667-42933779:42933997:+	-0.593729	0.0184815	1	1	0.0617587
46	ENSMUSG00000036466	ENSMUSG00000036466;RI:9:64705727:64705933-64706527:64709205:+	-0.512558	0.0579421	1	1	-1.1587
47	ENSMUSG00000036570	ENSMUSG00000036570;RI:7:31051678:31051815-31051933:31051987:-	-0.357075	0.0769231	1	1	0.497184
48	ENSMUSG00000037544	ENSMUSG00000037544;RI:14:47394137:47394317-47395755:47395974:-	-0.125913	0.0569431	1	1	0.40506
49	ENSMUSG00000037720	ENSMUSG00000037720;RI:5:67260696:67260806-67260964:67261033:+	NA	1	1	1	1.00195
50	ENSMUSG00000037720	ENSMUSG00000037720;RI:5:67286096:67286216-67287010:67291461:+	-0.0532164	0.0974026	1	1	1.00195
51	ENSMUSG00000038812	ENSMUSG00000038812;RI:19:6910584:6910673-6910752:6911028:+	-0.0766094	0.0704296	1	1	1.09072
52	ENSMUSG00000040111	ENSMUSG00000040111;RI:9:40293233:40294427-40297986:40298079:-	-0.0516044	0.0824176	1	1	1.64113
53	ENSMUSG00000040703	ENSMUSG00000040703;RI:7:25802475:25803759-25803916:25804057:-	0.666667	0.0394605	1	1	-1.45607
54	ENSMUSG00000045994	ENSMUSG00000045994;RI:9:26751505:26751599-26751744:26751890:+	0.666667	0.0394605	1	1	-1.39372
55	ENSMUSG00000047330	ENSMUSG00000047330;RI:1:78817611:78817821-78818497:78820028:+	-0.199171	0.0844156	1	1	-0.167301
56	ENSMUSG00000048191	ENSMUSG00000048191;RI:7:141636283:141639874-141640070:141640611:-	-0.310302	0.0959041	1	1	-0.773951
57	ENSMUSG00000049643	ENSMUSG00000049643;RI:7:27580337:27580691-27581351:27582099:+	0.12417	0.0579421	1	1	0.363672
58	ENSMUSG00000050711	ENSMUSG00000050711;RI:1:79434669:79435931-79436052:79437018:-	0.333333	0.0874126	1	1	-1.22213
59	ENSMUSG00000054435	ENSMUSG00000054435;RI:6:48690371:48690457-48690842:48690948:+	NA	1	1	1	-0.0761404
60	ENSMUSG00000054435	ENSMUSG00000054435;RI:6:48690371:48690457-48691366:48692060:+	-0.3608	0.0444555	1	1	-0.0761404
61	ENSMUSG00000054435	ENSMUSG00000054435;RI:6:48690371:48690513-48690777:48690948:+	NA	1	1	1	-0.0761404
62	ENSMUSG00000054435	ENSMUSG00000054435;RI:6:48690371:48690948-48691398:48692060:+	-0.40753	0.0444555	1	1	-0.0761404
63	ENSMUSG00000054619	ENSMUSG00000054619;RI:15:100304923:100305074-100305174:100305344:+	0.433475	0.0749251	1	1	-0.394408
64	ENSMUSG00000054619	ENSMUSG00000054619;RI:15:100304997:100305074-100305174:100305344:+	NA	1	1	1	-0.394408
65	ENSMUSG00000064120	ENSMUSG00000064120;RI:17:49454030:49454201-49455257:49455435:+	-0.316374	0.0934066	1	1	-0.423848
66	ENSMUSG00000078784	ENSMUSG00000078784;RI:3:14606289:14606408-14607177:14607293:-	-0.0850381	0.0864136	1	1	0.690184
67	ENSMUSG00000090112	ENSMUSG00000090112;RI:10:11207097:11207275-11207822:11209552:+	-0.557872	0.0539461	1	1	-0.104905
68	ENSMUSG00000090626	ENSMUSG00000090626;RI:9:72479924:72480001-72480597:72480775:-	NA	1	1	1	1.31112
69	ENSMUSG00000090626	ENSMUSG00000090626;RI:9:72491739:72491818-72491926:72491956:-	0.127027	0.035964	1	1	1.31112
70	ENSMUSG00000096768	ENSMUSG00000096768;RI:Y:90816349:90816433-90816436:90816464:+	0.0646488	0.0734266	1	1	1.15161
71	ENSMUSG00000098950	ENSMUSG00000098950;RI:2:156078147:156078233-156078332:156078421:-	0.621826	0.0194805	1	1	0.366369
